# Supplementary material for: A High-Throughput HIV-1 Drug Screening Platform, Based on Lentiviral Vectors and Compatible with Biosafety Level-1
Source: MDPI journal article supplement (doi:10.3390/v12050580), 2020-05-25
Supplement: s1 [file s1]

## Supplementary Material

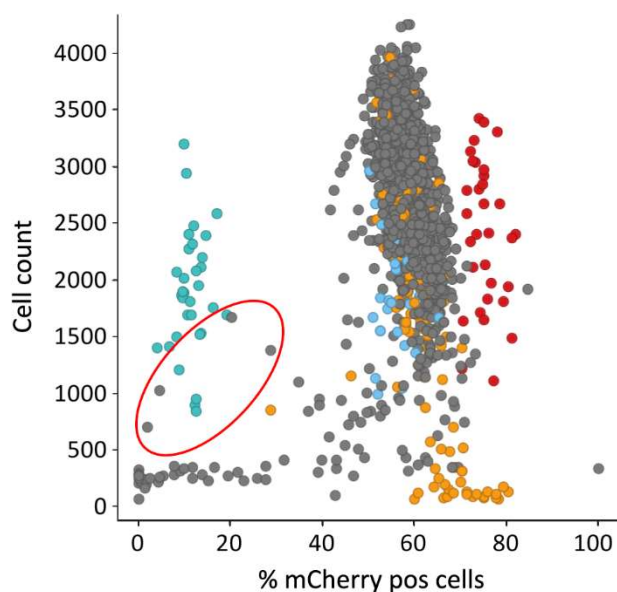

**Figure S1:** Fluorescence-based proof-of-concept screen. Relative number of transduced cells, data shown as average per well. Co-transduced compound-treated wells shown in grey and co-transduced AZT-treated wells in turquoise. Cells transduced using mCherry only are shown in red, co-transduced DMSO-treated wells in orange and co-transduced untreated wells in light blue. Compound-treated wells encircled in red represent the four most promising hits of the screening.

**Table S1:** Hits of the fluorescence-based proof of concept screen compared to the luciferase-based data. The negative inhibition value of Fenoldopam bromide is due to an increase of the luciferase signal in the screen. The inhibition value above 100% in explained by the AZT normalization of the assay, as the internal control is not abolishing the luciferase signal.

| Compound                                           | Relative inhibition [%] of |                           |                              | Viability [%]* |
|----------------------------------------------------|----------------------------|---------------------------|------------------------------|----------------|
|                                                    | eGFP<br>(mutant RT)        | mCherry<br>(wild-type RT) | luciferase<br>(wild-type RT) |                |
| Cytosine-1-beta-D-arabino-furanoside hydrochloride | 95                         | 98                        | 211                          | 38             |
| PMEG hydrate                                       | 70                         | 94                        | 156                          | 54             |
| Fenoldopam bromide                                 | 65                         | 61                        | -40                          | 73             |
| 3'-Azido-3'-deoxythymidine                         | 38                         | 73                        | 85                           | 89             |

**Table S2:** Compounds with antiviral mode of action in the LOPAC library which appeared to be not active in the fluorescence-based proof of concept screen. The table lists all the compounds from the LOPAC library with an antiviral mode of action, which were not identified as hits, as well as the data of the screen and an explanation if the compound has to be counted as false negative, e.g. if the assay should have identified this compound as active.

| Compound | Description within LOPAC | Rel. inhibition [%] of eGFP | Rel. inhibition [%] of | Viability [%] | Explanation in the context of the assay. False negative |
|----------|--------------------------|-----------------------------|------------------------|---------------|---------------------------------------------------------|
|----------|--------------------------|-----------------------------|------------------------|---------------|---------------------------------------------------------|

|                             |                                                                                                                            | (mutant<br>RT) | mCherry (wild-<br>type<br>RT) |    |                                                                                                                                                                                                                                                                                                                                                                                                                      |
|-----------------------------|----------------------------------------------------------------------------------------------------------------------------|----------------|-------------------------------|----|----------------------------------------------------------------------------------------------------------------------------------------------------------------------------------------------------------------------------------------------------------------------------------------------------------------------------------------------------------------------------------------------------------------------|
| Amantadine hydrochloride    | Dopamine releaser used in the treatment of Parkinsonism and drug-related extrapyramidal reactions; antiviral (Influenza A) | -29            | 6                             | 67 | The compound class was also tested against HIV and found to work via a membranotropic mode of action. Although it can be active against HIV in general, it can be imagined that the murine receptor used during screening is not responsive to this type of inhibition. The compound was identified correctly as not active.                                                                                         |
| Acyclovir                   | Antiviral agent                                                                                                            | -33            | 41                            | 88 | Acycloguanosine (Aciclovir) is a prodrug, requiring a viral thymidine kinase not present in HIV to be activated. The compound was identified correctly as not active.                                                                                                                                                                                                                                                |
| 2',3'-Dideoxycytidine       | Nucleoside analog; reverse transcriptase inhibitor; antiviral                                                              | 99             | 100                           | 7  | The compound ddC (Zalcitabin) is a nucleosidic reverse transcriptase inhibitor. In this assay the compound was identified as toxic and therefore not followed up. The compound was identified correctly as active and toxic and was therefore not pursued further.                                                                                                                                                   |
| 3-Deazaadenosine            | Antiviral                                                                                                                  | -34            | -25                           | 85 | The nucleoside analog 3-Deazaadenosine inhibits andenosylhomocysteine hydrolase and thereby the methylation of membrane phospholipids. In the case of HIV it acts on endocytosis and viral entry and not on reverse transcriptase activity [1]. It can be imagined that the murine receptor used during screening is not responsive to this type of inhibition. The compound was identified correctly as not active. |
| Nelfinavir mesylate hydrate | Nelfinavir is a HIV protease inhibitor; antiretroviral; and anti-tumor agent                                               | 49             | 90                            | 26 | Nelfinavir is a HIV protease inhibitor, which is not active in the screen as HIV protease activity is not part of the cascade the screen can analyse. The assay utilizes mature viral particles, not relying on protease activity. The compound was identified correctly as not active.                                                                                                                              |
| Famciclovir                 | Famciclovir is an antiviral                                                                                                | 100            | 100                           | 7  | Famciclovir is a prodrug, requiring a viral thymidine kinase not                                                                                                                                                                                                                                                                                                                                                     |

|           |                                                                                                                       |     |     |    |                                                                                                                                                                                   |
|-----------|-----------------------------------------------------------------------------------------------------------------------|-----|-----|----|-----------------------------------------------------------------------------------------------------------------------------------------------------------------------------------|
|           |                                                                                                                       |     |     |    | present in HIV to be activated. The compound was identified correctly as not active.                                                                                              |
| Ribavirin | Antiviral agent; its metabolite, ribavirin 5'-phosphate, is an inhibitor of inosine monophosphate (IMP) dehydrogenase | -73 | -21 | 81 | The compound (Ribavirin) has a complicated mode of action, but is not effective against RNA viruses in single therapy [2,3]. The compound was identified correctly as not active. |

**Table S3:** Activity in the viral integration assay and structural information of selected hit compounds.

| Name     | Cluster | IC <sub>50</sub> (in μM) | Smile                                                                         |
|----------|---------|--------------------------|-------------------------------------------------------------------------------|
| T5407044 | 1       | 4.11                     | <chem>COC1=CC=C(C=C1)S(=O)(=O)N(CC1=CC(=CC=C1)C(F)(F)F)C1=C(OC)C=CC=C1</chem> |
| T5788505 | 2       | 1.99                     | <chem>CC(NC(=O)CSC1=C(C#N)C(C)=C(C)C(C)=N1)C1=CC=CS1</chem>                   |
| T5989363 | 2       | 7.91                     | <chem>CC(C)CCNC(=O)CSC1=C(C#N)C(C)=C(C)C(C)=N1</chem>                         |
| T5615894 | 3       | 2.93                     | <chem>CC1=CC=CN2C(=O)C=C(CN3CC(OC4=C3C=CC=C4)C(=O)N3CCCCC3)N=C12</chem>       |
| T6329376 | 3       | 4.83                     | <chem>CC1=C(CN2CC(OC3=C2C=CC=C3)C(=O)N2CCCCC2)N=C(O1)C1=CC=CC=C1</chem>       |
| T5938606 | 4       | 5.91                     | <chem>CCC1=CC=C(C=C1)C1=CSC(CN2C(CN3CCOCC3)=NC3=C(C=CC=C3)C2=O)=N1</chem>     |
| T5938605 | 4       | 8.71                     | <chem>FC1=CC=C(C=C1)C1=CSC(CN2C(CN3CCOCC3)=NC3=C(C=CC=C3)C2=O)=N1</chem>      |
| T6496714 | 5       | 2.44                     | <chem>COC1=CC(OC)=C(C=C1)C1CCCN1C(=O)C1CN(C(=O)C1)C1=C(F)C=CC=C1</chem>       |
| T6517641 | 5       | 6.83                     | <chem>COC1=CC(C2CCCN2C(=O)C2CN(C(=O)C2)C2=CC=CC=C2)=C(OC)C=C1</chem>          |
| T6098586 | 6       | 1.78                     | <chem>ClC1=C(C=C(C=C1)S(=O)(=O)N1CCOCC1)C(=O)NC1=C(C=CC=C1)N1CCCC1</chem>     |
| T6382120 | 6       | 2.86                     | <chem>FC1=C(C=C(C=C1)S(=O)(=O)N1CCOCC1)C(=O)NC1=C(C=CC=C1)N1CCCC1</chem>      |
| T6137813 | 6       | 5.04                     | <chem>ClC1=C(C=C(C=C1)S(=O)(=O)N1CCOCC1)C(=O)NC1=C(C=CC=C1)N1CCCC1</chem>     |
| T5530682 | 6       | 8.26                     | <chem>CC1=C(C=C(C=C1)S(=O)(=O)N1CCOCC1)C(=O)NC1=C(C=CC=C1)N1CCCC1</chem>      |
| T6328287 | 7       | 3.89                     | <chem>COC1=C(C=CC=C1)N1CCN(CC1)C(=O)C1=C(O)C=CC(Cl)=C1</chem>                 |
| T5821319 | 8       | 1.58                     | <chem>O=C(NC1=CC2=C(OCO2)C=C1)C1=CC(=CC=C1)N1CCCC1=O</chem>                   |
| T5609721 | 8       | 4.12                     | <chem>O=C(NC1=CC2=C(OCCCC2)C=C1)C1=CC(=CC=C1)N1CCCC1=O</chem>                 |
| T5351795 | 9       | 4.64                     | <chem>CC(C)CCN1C=NC2=C1C(=O)N(CC(=O)NC1CC1)C(=O)N2CC1=CC=CC=C1</chem>         |

|          |    |      |                                                                                      |
|----------|----|------|--------------------------------------------------------------------------------------|
| T5488769 | 9  | 9.06 | <chem>CC(C)CCN1C=NC2=C1C(=O)N(CC(=O)NC(C)C)C(=O)N2CC1=CC=CC=C1</chem>                |
| T5945790 | 10 | 6.78 | <chem>O=C(COC1=C(C=CC=C1)C1=CC=CC=C1)NCC1=C(CN2C=CC=N2)C=CC=C1</chem>                |
| T5339957 | 10 | 6.88 | <chem>O=C(COC1=C(C=CC=C1)C1=CC=CC=C1)NCC1CCCCC1</chem>                               |
| T5781151 | 10 | 6.94 | <chem>O=C(COC1=C(C=CC=C1)C1=CC=CC=C1)NCC1=C(CN2CCOCC2)C=CC=C1</chem>                 |
| T6213020 | 12 | 2.79 | <chem>COC1=CC=C(NS(=O)(=O)C2=CC(=CC=C2)C(=O)NCC(N2CCCCC2)C2=CC=C(OC)C=C2)C=C1</chem> |
| T5643556 | 13 | 6.19 | <chem>FC1=CC=C(C=C1)C1=CSC2=C1C(SC1=NC=C(C=C1)S(=O)(=O)N1CCOCC1)=NC=N2</chem>        |
| T5413794 | 13 | 6.91 | <chem>FC1=CC=C(C=C1)C1=CSC2=C1C(OC1=CC=C(C=C1)S(=O)(=O)N1CCOCC1)=NC=N2</chem>        |
| T5650116 | 14 | 2.79 | <chem>COC(=O)C1=CC=C(C=C1)C(=O)NC1=NC=C(C)S1</chem>                                  |
| T6026407 | 15 | 2.73 | <chem>C(N1CCOCC1)C1=NC2=C(C(=CS2)C2=CC=CS2)C(NN2CCCCC2)=N1</chem>                    |
| T5605915 | 15 | 4.67 | <chem>C(NC1=C2C(SC=C2C2=CC=CS2)=NC(CN2CCOCC2)=N1)C1=CC=CC=C1</chem>                  |
| T6061512 | 15 | 6.48 | <chem>C(NC1=C2C(SC=C2C2=CC=CS2)=NC(CN2CCOCC2)=N1)C1CCCO1</chem>                      |
| T6312425 | 15 | >10  | <chem>C(CC1=NC=CC=C1)NC1=C2C(SC=C2C2=CC=CS2)=NC(CN2CCOCC2)=N1</chem>                 |
| T6357587 | 16 | 8.3  | <chem>O=C(CC1=CSC(=N1)C1=NC=CC=C1)N=C1SC=CN1CC1=CC=CC=C1</chem>                      |
| T5344625 | 17 | 1.72 | <chem>O=C(CSC1=NC2=C(C=CC=C2)C(=O)N1CC1=CC=CO1)N1CCN(CC1)C1=CC=CC=C1</chem>          |
| T6302141 | 18 | 2.24 | <chem>CN(C1CCCCC1)S(=O)(=O)C1=CC(=CC=C1)C#N</chem>                                   |
| T5339669 | 18 | 5.2  | <chem>CN(C1CCCCC1)S(=O)(=O)C1=CC(=CC=C1)C#N</chem>                                   |
| T6468172 | 19 | 1.04 | <chem>BrC1=C(C=CC=C1)C(=O)NC1=C(C=CC=C1)N1C=CC=N1</chem>                             |
| T6043692 | 19 | 4.11 | <chem>OC1=C(NC(=O)C2=C(Br)C=CC=C2)C=CC=C1</chem>                                     |
| T5952497 | 20 | 4.27 | <chem>O=S(=O)(N1CCC(CCC2=CC=CC=C2)CC1)C1=C(C=CC=C1)C#N</chem>                        |
| T5432718 | 20 | 6.33 | <chem>O=S(=O)(N1CCN(CC2=CC=C(C=C2)C2=CC=CC=C2)CC1)C1=C(C=CC=C1)C#N</chem>            |
| T5823772 | 22 | 8.88 | <chem>CC1=CC=CC(C)=C1NC(=O)CN1CCCC1C1=NC2=C(S1)C=CC=C2</chem>                        |
| T5989502 | 24 | 1.94 | <chem>CC(=O)C1=C(NC(=O)CNC2=C(C=CC=C2)C2=CC=CC=C2)C=CC=C1</chem>                     |
| T5947021 | 24 | 5.61 | <chem>CC1=C(NC(=O)CNC2=C(C=CC=C2)C2=CC=CC=C2)C=CC=C1</chem>                          |
| T5943324 | 24 | 7.79 | <chem>ClC1=C(NC(=O)CNC2=C(C=CC=C2)C2=CC=CC=C2)C=CC=C1</chem>                         |
| T6366633 | 30 | 1.67 | <chem>FC1=CC=C(C=C1)C1=CSC2=C1C(SCC1=CC=C(O1)S(=O)(=O)N1CCCC1)=NC=N2</chem>          |
| T6471356 | 31 | 2.37 | <chem>C=CCNC(=O)CN1CCN(CC1)C1=NC2=C(S1)C=CC=C2</chem>                                |
| T6203208 | 32 | 4.37 | <chem>CC(C)C1=CC=C(C=C1)C1NC(=S)NC(C)=C1C(=O)OCC=C</chem>                            |
| T6312190 | 33 | 2.02 | <chem>CC1=C(Cl)C(=C(C)C(Cl)=C1)S(=O)(=O)NCCCN1CCCC1=O</chem>                         |
| T5776163 | 37 | 4.7  | <chem>CCOC1=C(C=CC=N1)C(=O)OCC1=NC2=C(C(C)=C(C)S2)C(N)=N1</chem>                     |
| T5983422 | 38 | 2.28 | <chem>O=C1NC(CSC2=NN=C(O2)C2CC2)=NC2=C1C(=CS2)C1=CC=CO1</chem>                       |

|            |    |      |                                                                                     |
|------------|----|------|-------------------------------------------------------------------------------------|
| T5435331   | 39 | 3.14 | <chem>COC1=CC=C(C=C1)N(CC1=CC=CC=C1)S(=O)(=O)C1=CC(=CC=C1)C(=O)NCC1=CC=NC=C1</chem> |
| T5869032   | 40 | 1.1  | <chem>CCOC1=CC=C(C=C1)C(=O)NC1=C(F)C=CC(C)=C1</chem>                                |
| T5506295   | 40 | 1.77 | <chem>CC1=CC(NC(=O)C2=CC=C(OC(F)F)C=C2)=C(F)C=C1</chem>                             |
| T5950416   | 42 | 2.08 | <chem>CS(=O)(=O)C1=CC=C(NC(=O)CNC2=C(C=CC=C2)C2=CC=CC=C2)C=C1</chem>                |
| T5941648   | 42 | 7.85 | <chem>CC(=O)C1=CC=C(NC(=O)CNC2=C(C=CC=C2)C2=CC=CC=C2)C=C1</chem>                    |
| T6332191   | 43 | 1.42 | <chem>CC1=CC2=C(N=C1)C(=CC=C2)S(=O)(=O)N1CCN(CC2=CC3=C(OCCO3)C=C2)CC1</chem>        |
| T6053460   | 47 | 6.46 | <chem>COC1=CC=C(CC(=O)NC2=CC=C(OC)C=C2)C=C1</chem>                                  |
| T6007055   | 49 | 1.35 | <chem>COC(=O)C1=C(NS(=O)(=O)C2=C(Br)C=C(F)C=C2F)C=CC=C1</chem>                      |
| T5989159   | 51 | 1.67 | <chem>CCC(C)C1=CC=C(C=C1)S(=O)(=O)NC1=C(C)C=C(F)C=C1</chem>                         |
| T5805638   | 52 | 1.45 | <chem>CC1=C(C=CC=C1)N1N=NN=C1SCC1=NN=C(O1)C1=CC=CS1</chem>                          |
| T0516-3343 | 53 | 6.07 | <chem>CCNC(=O)COC(=O)C1=C2C=CC=CC2=NC(=C1C)C1=CC(Cl)=CC=C1</chem>                   |
| T5633521   | 56 | 1.05 | <chem>CCNC1=NN=C(CS1)C1=C(C)N(C2CC2)C(C)=C1</chem>                                  |
| T5932815   | 60 | 2    | <chem>CC1CCN(CC1)C1=C2C(SC=C2C2=CC=CS2)=NC(CN2CCOCC2)=N1</chem>                     |
| T5587925   | 60 | 3.97 | <chem>C(N1CCOCC1)C1=NC2=C(C(=CS2)C2=CC=CS2)C(=N1)N1CCCC1</chem>                     |
| T5952126   | 61 | 1.53 | <chem>CC(NC1=C2C3=C(CCC3)SC2=NC(CN2CCOCC2)=N1)C1=CC(Cl)=CC=C1</chem>                |
| T5964141   | 65 | 1.26 | <chem>O=C(CSC1=NN=C(O1)C1CC1)NC(C1=CC=CS1)C1=CC=CC=C1</chem>                        |
| T6068357   | 66 | 1.49 | <chem>CCN1C(=O)C2=C(C=CS2)N=C1SCC(=O)NC1=C(C=CC=C1)C#N</chem>                       |
| T6671011   | 68 | 4    | <chem>C(NC1=C(C=CC=C1)N1C=CC=N1)C1=NC(=NO1)C1=CC=CO1</chem>                         |
| T5595439   | 71 | 2.98 | <chem>CC1=CC(C)=C(C=C1)N1N=NN=C1SC1=NN=NN1C1=CC=CC=C1</chem>                        |
| T5258076   | 76 | 4.76 | <chem>FC(F)(F)C1=C(C=CC=C1)N1C(SCC(=O)NCC2=CC=CO2)=NN=C1C1=CC(Cl)=CC=C1</chem>      |
| T5363639   | 79 | 2    | <chem>ClC1=CC(NC2=C3C(SC=C3C3=CC=CC=C3)=NC(CN3CCOCC3)=N2)=CC=C1</chem>              |
| T5948460   | 79 | 2.33 | <chem>C(CC1CCCO1)NC1=C2C(SC=C2C2=CC=CC=C2)=NC(CN2CCOCC2)=N1</chem>                  |

**Table S4:** Hit and confirmation rates of the different screening campaigns. The table lists the screening statistics of the different screening campaigns performed during different phase of assay optimization. A low confirmation rate does not imply a poor screening performance, but reflect the additional filter applied.

| Assay                                         | Compounds screened | Criteria for hit identification                              | Actives (hit rate in %) | Criteria for hit progression                                      | Confirmed actives (hit rate in %) |
|-----------------------------------------------|--------------------|--------------------------------------------------------------|-------------------------|-------------------------------------------------------------------|-----------------------------------|
| Fluorescence-based proof of concept screening | 1,280              | Reduction of at least one transduction rate to less than 30% | 35 (2.7%)               | Confirmed activity and more than 70% viable cells after treatment | 4 (11.4%)                         |
| Luciferase-based proof of concept screen      | 1,280              | Reduction of the transduction                                | 68 (5.3%)               | Confirmed activity and more than                                  | 41 (60.3%)                        |

|                                            |        |                                                                  |            |                                                                                            |             |
|--------------------------------------------|--------|------------------------------------------------------------------|------------|--------------------------------------------------------------------------------------------|-------------|
| Luciferase based high throughput screening | 26,048 | rate to less than 30%                                            | 930 (3.6%) | 70% viable cells after treatment                                                           |             |
|                                            |        | Reduction of the signal by at least 60% compared to the controls |            | Reduction of the signal by at least 66%, standard deviation below 10%, viability above 80% | 456 (49.0%) |

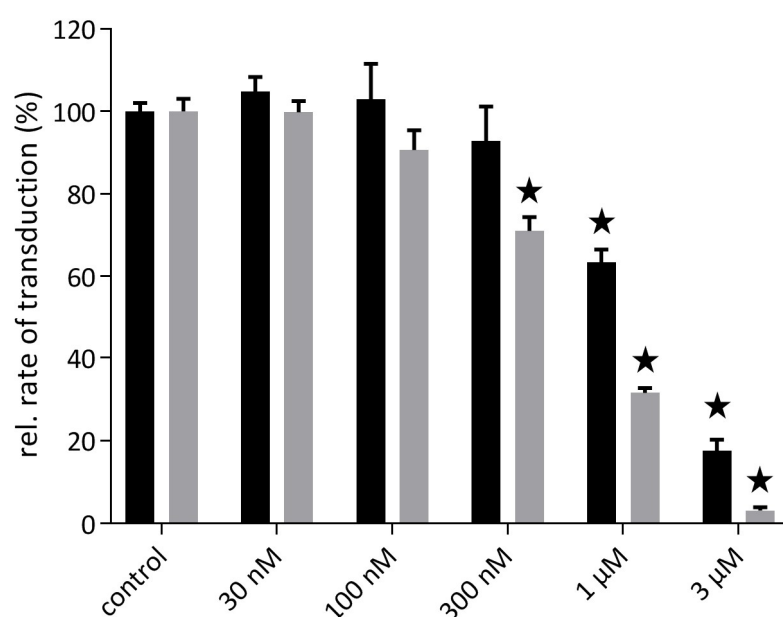

**Figure S2:** Activity of PMEG hydrate analyzed in FC-based assay. Dose-response analysis of PMEG hydrate using flow cytometry. Data are represented relative to DMSO-treated control. PMEG hydrate concentrations resulting in a significant deviation from the control are marked using an asterisk (t-test,  $p < 0.001$ ). Higher concentrations were excluded due to compound toxicity. Cells transduced using eGFP-encoding vectors (mutant reverse transcriptase) are shown in black, mCherry-only transduced cells (wild-type reverse transcriptase) in grey.

## References

1. Flexner, C.W.; Hildreth, J.E.; Kuncl, R.W.; Drachman, D.B. 3-Deaza-adenosine and inhibition of HIV. *Lancet* 1992, 339, 438, doi:10.1016/0140-6736(92)90133-n.
2. Carrillo-Bustamante, P.; Nguyen, T.H.T.; Oestereich, L.; Günther, S.; Guedj, J.; Graw, F. Determining Ribavirin's mechanism of action against Lassa virus infection. *Sci. Rep.* 2017, 7, 11693, doi:10.1038/s41598-017-10198-0.
3. Lau, J.Y.N.; Tam, R.C.; Liang, T.J.; Hong, Z. Mechanism of action of ribavirin in the combination treatment of chronic HCV infection. *Hepatology* 2002, 35, 1002–1009, doi:10.1053/jhep.2002.32672.

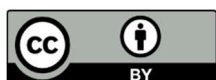

© 2020 by the authors. Submitted for possible open access publication under the terms and conditions of the Creative Commons Attribution (CC BY) license (<http://creativecommons.org/licenses/by/4.0/>).
